# Supplementary material for: Novel mono-cationic fluorescent probes based on different central π-conjugated bridges for two-photon bioimaging of cellular nuclei
Source: Royal Society of Chemistry journal article supplement (doi:10.1039/c6ra12193d), 2016-01-01

## Supporting Information

### **Novel mono-cationic fluorescent probes based on different central $\pi$ -conjugated bridges for two-photon bioimaging of cellular nucleus**

Shuheng Chi<sup>a,b</sup>, Liang Li<sup>a,b</sup>, Yiqun Wu<sup>a,c,\*</sup>

<sup>a</sup> *Key Laboratory of Material Science and Technology for High Power Lasers,  
Shanghai Institute of Optics and Fine Mechanics, Chinese Academy of Sciences,  
Shanghai 201800, PR China*

<sup>b</sup> *University of Chinese Academy of Sciences, Beijing 100049, China*

<sup>c</sup> *Key Lab of Functional Inorganic Material Chemistry (Heilongjiang University),  
Ministry of Education, Harbin 150080, PR China*

*\*Corresponding author. Tel.: +86 021 6991 8592*

*Email Address: \*yqwu@siom.ac.cn*

# $^1\text{H}$ NMR, $^{13}\text{C}$ NMR and MALDI-TOF-MS spectra

## $^1\text{H}$ NMR spectra of W-pyI (500 MHz, DMSO)

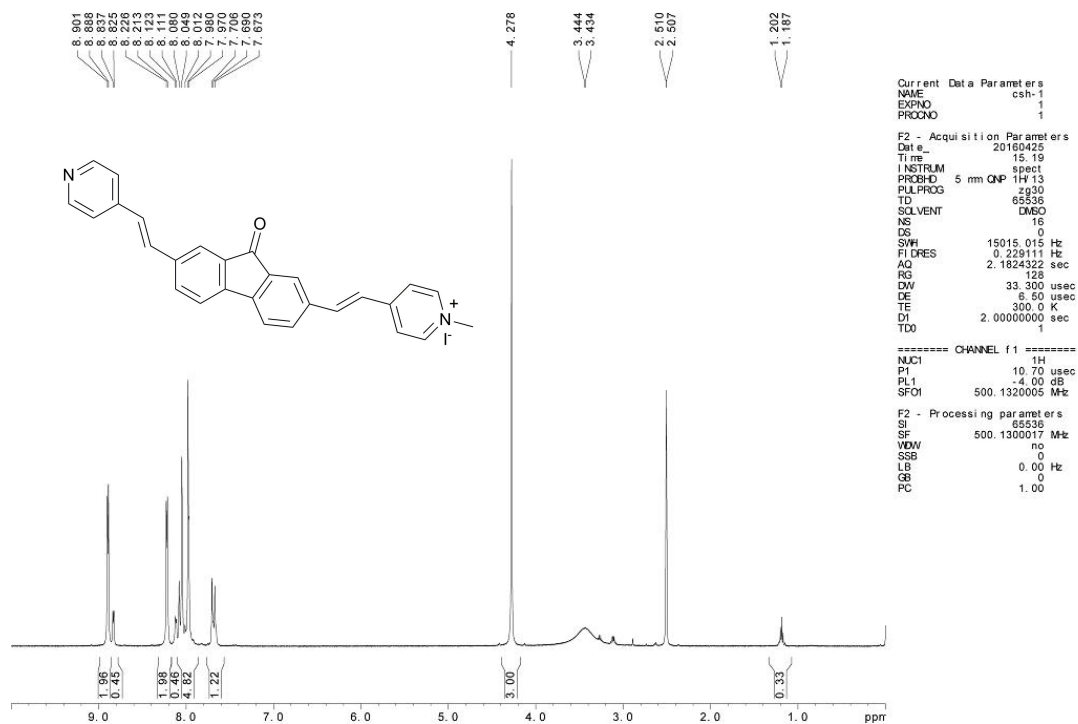

## $^1\text{H}$ NMR spectra of S-pyI (400 MHz, DMSO)

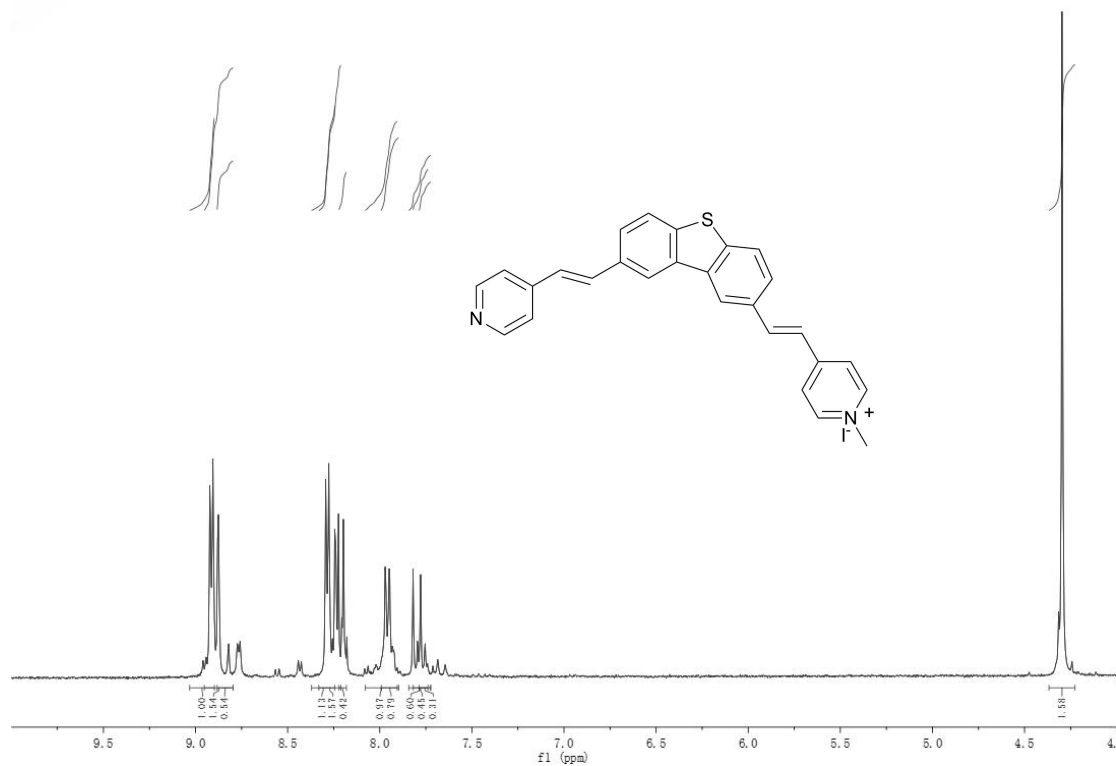

# <sup>1</sup>H NMR spectra of F-pyI (500 MHz, DMSO)

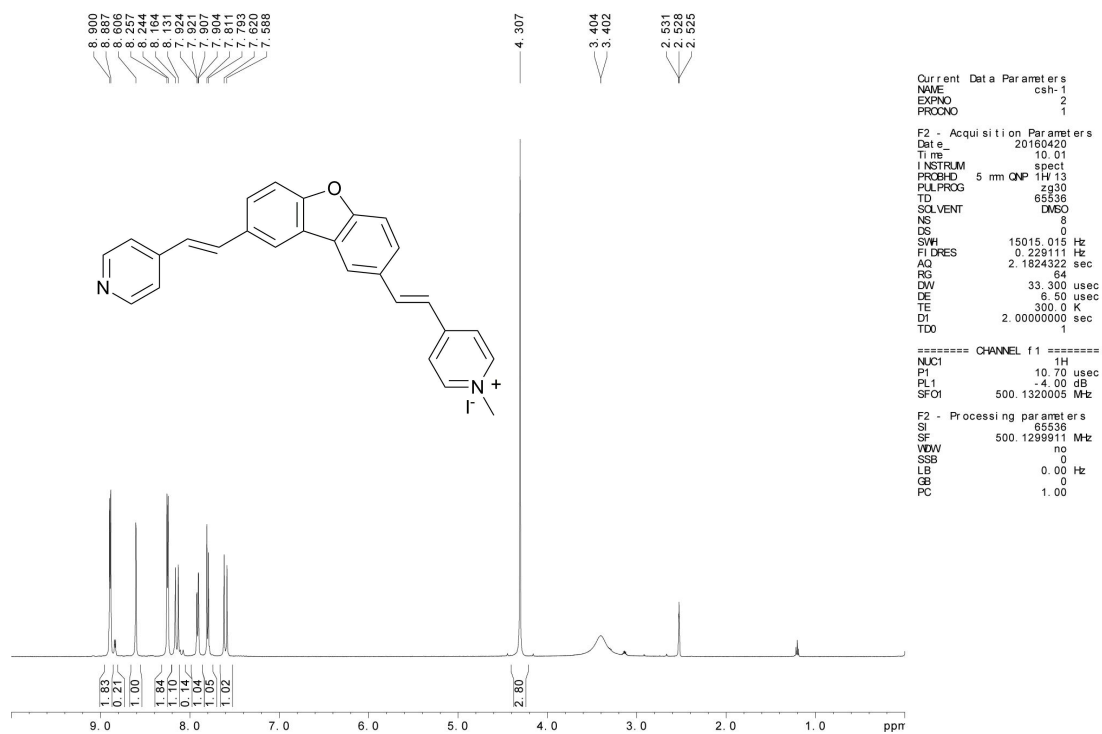

# <sup>13</sup>C NMR spectra of W-pyI (125 MHz, DMSO)

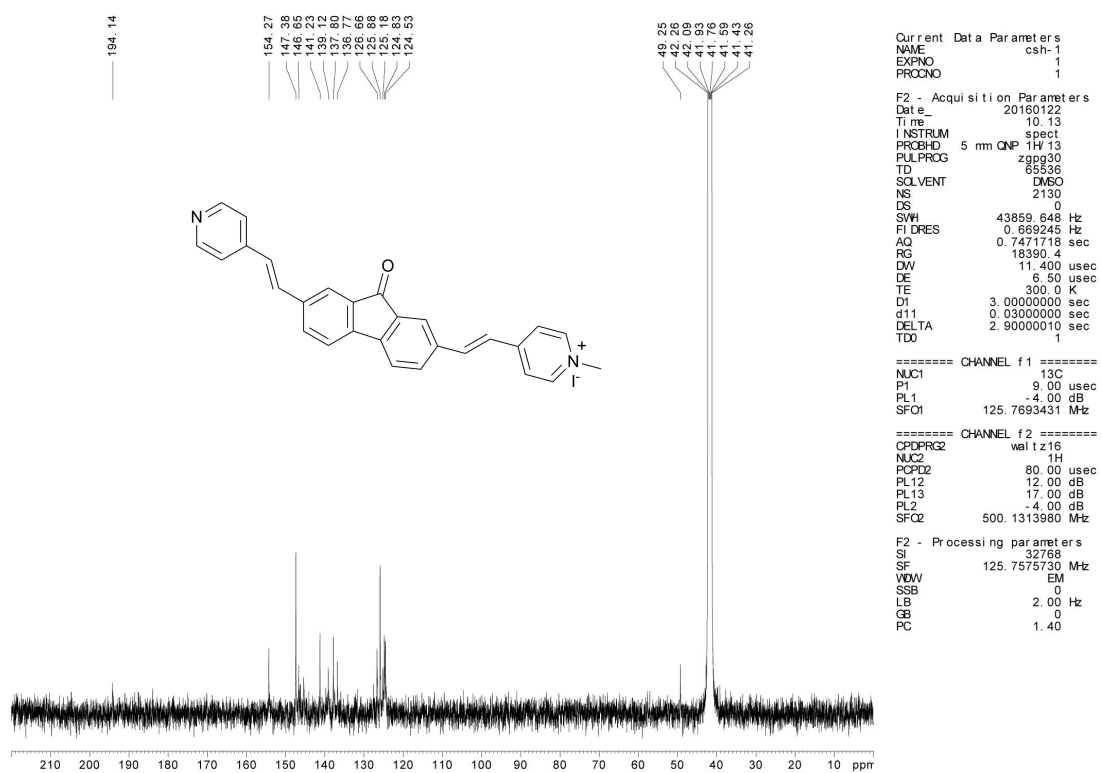

# <sup>13</sup>C NMR spectra of S-pyI (125 MHz, DMSO)

csh-1

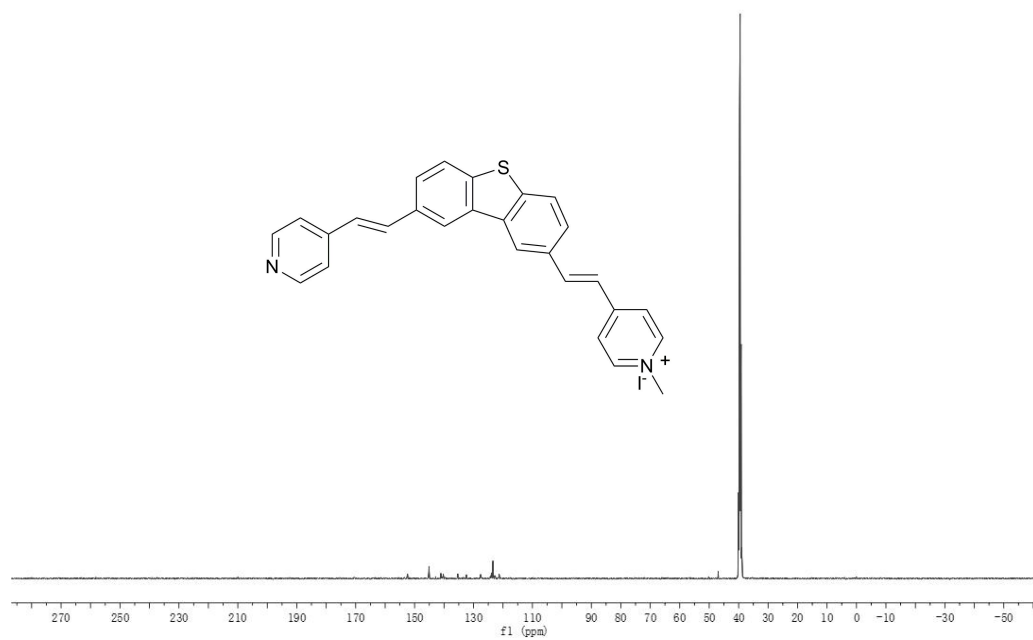

csh-1

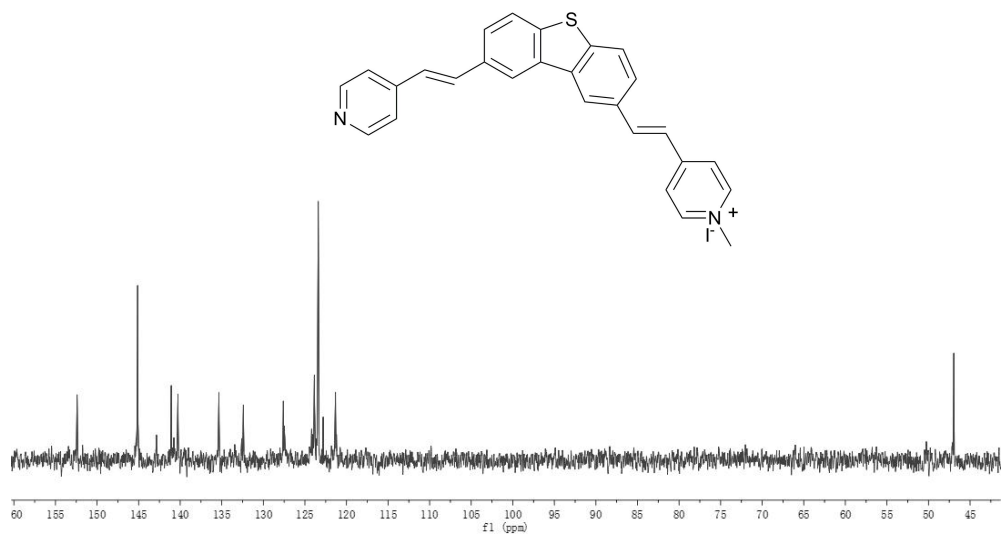

### <sup>13</sup>C NMR spectra of F-pyI (125 MHz, DMSO)

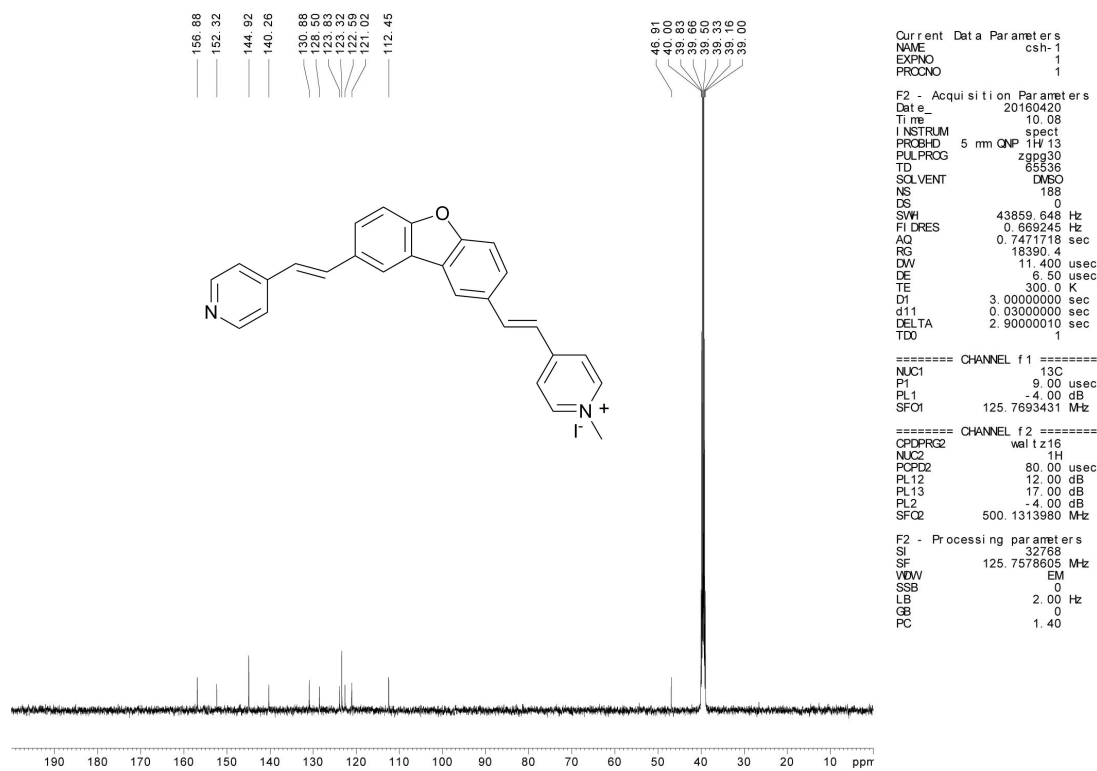

### MALDI-TOF-MS spectra of W-pyI

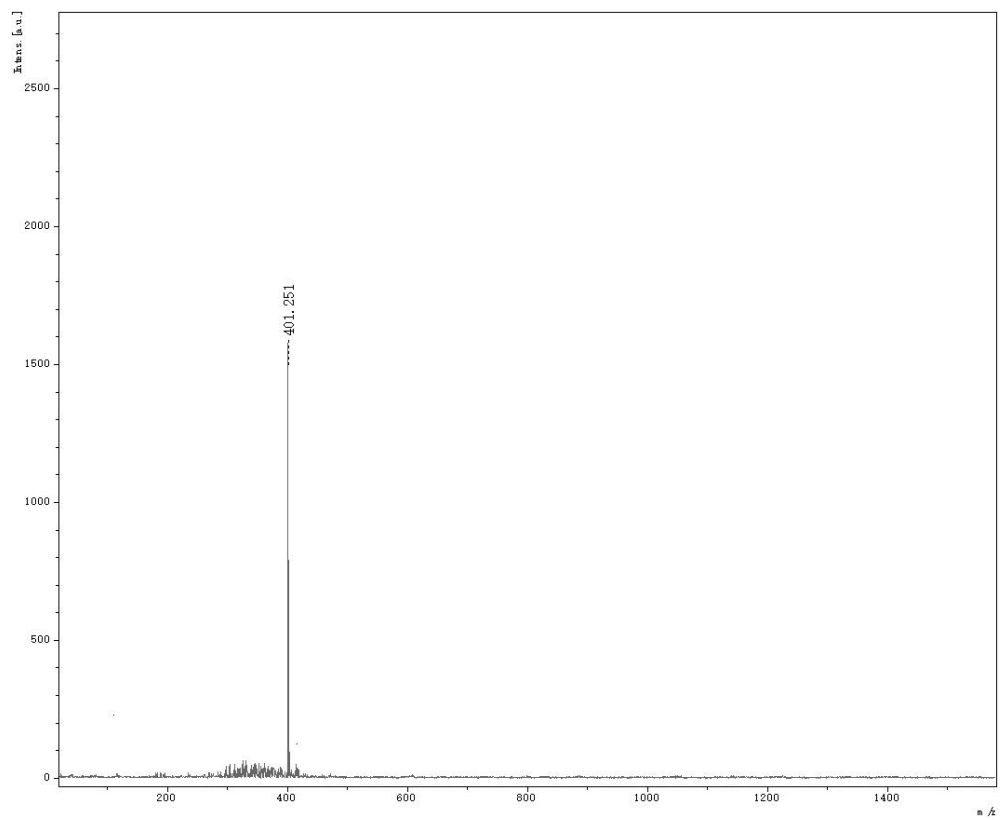

### MALDI-TOF-MS spectra of S-pyI

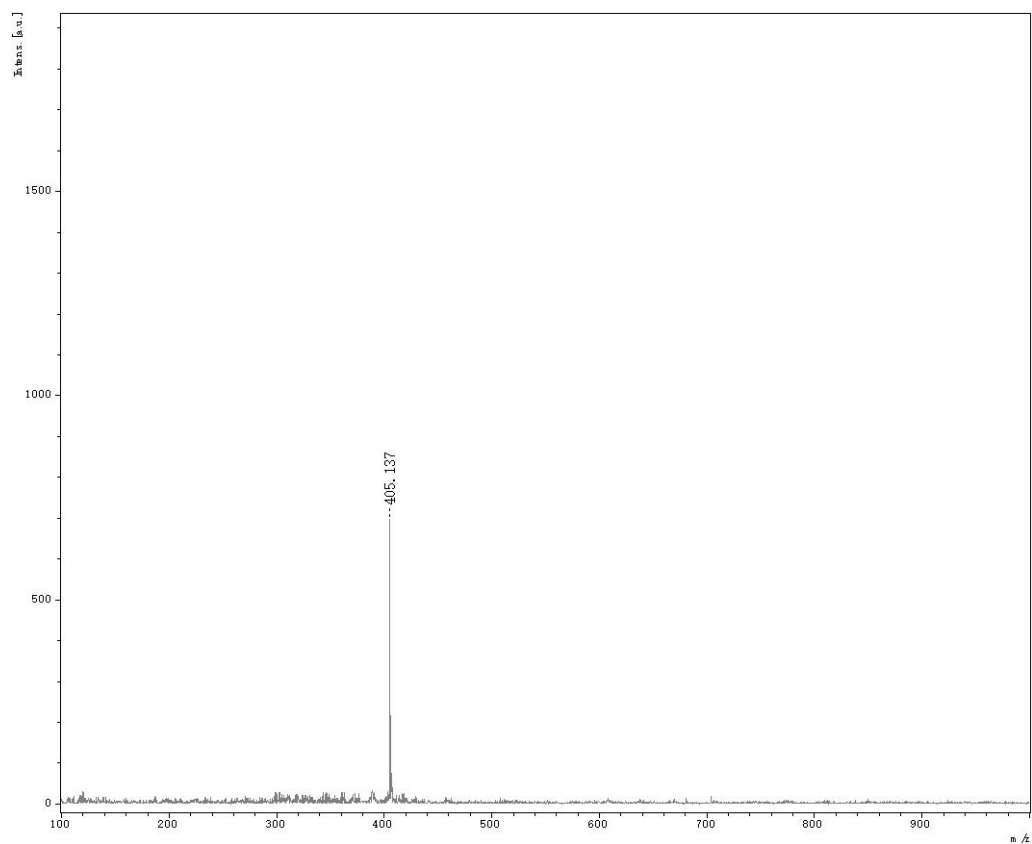

### MALDI-TOF-MS spectra of F-pyI

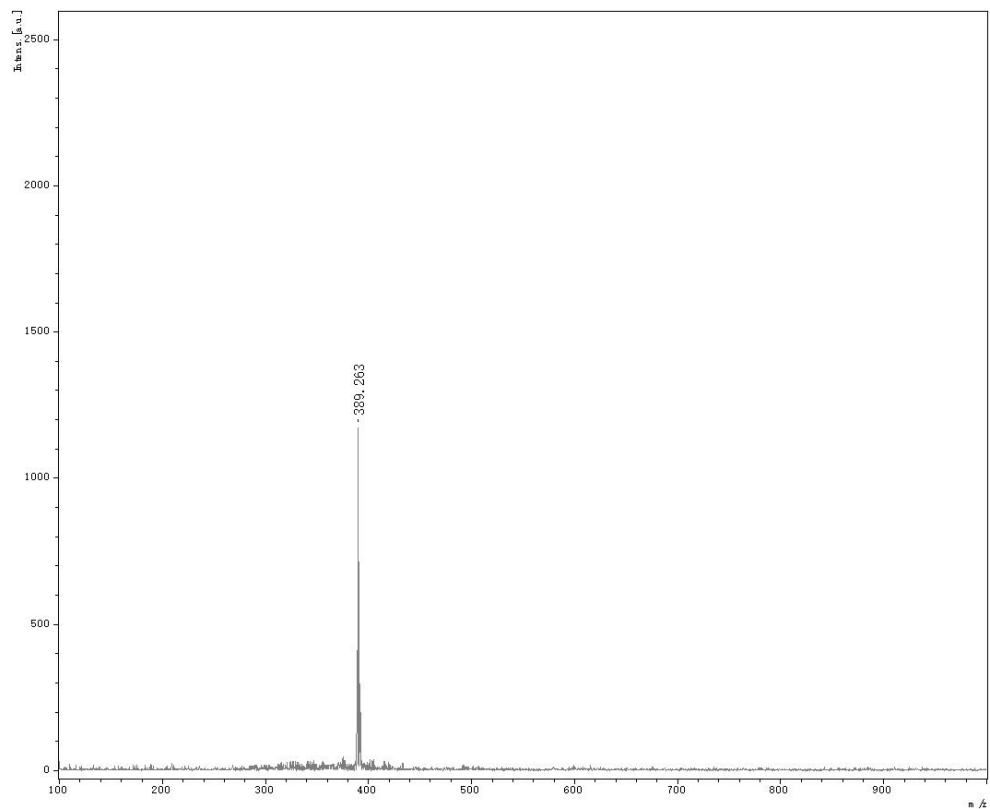

Supplement: c6ra12193d1.pdf [file c6ra12193d1.pdf]
